# Supplementary material
Source: Springer Nature journal article supplement (https://www.springermedizin.de/resource/supplementary/12905_2013_468_MOESM1_ESM.pdf/9518592)
Supplement: MOESM1 [file 9518592]

Women with symptomatic uterine prolapse POP-Q stage  $\geq 2$  requiring surgical treatment

Checking eligibility

Baseline examination

- Gynecological examination including POP-Q, ultrasound and PAP-smear
- Questionnaires

Informed consent

Randomization (n = 124)

Laparoscopic sacrohysteropexy (n = 62)

Vaginal sacrospinous hysteropexy (n = 62)

Follow-up visits at 6 weeks, 6 and 12 months and annually thereafter until the end of the study (5 years)

- Gynecological examination including POP-Q
- Questionnaires
